# Supplementary material for: Effects of ultraviolet radiation on photosynthetic performance and N 2 fixation in Trichodesmium erythraeum IMS 101
Source: Copernicus journal article supplement (doi:10.5194/bg-2017-106), 2017-03-24
Supplement: Supplementary file [file bg-2017-106-AC1-supplement.pdf]

1 **Effects of ultraviolet radiation on photosynthetic performance and N<sub>2</sub> fixation in**  
2 ***Trichodesmium erythraeum* IMS 101**

3 **Xiaoni Cai<sup>1,2</sup>, David A. Hutchins<sup>2</sup>, Feixue Fu<sup>2</sup> and Kunshan Gao<sup>1\*</sup>**

4 <sup>1</sup>State Key Laboratory of Marine Environmental Science, Xiamen University, Xiamen,  
5 Fujian, 361102, China

6 <sup>2</sup>Department of Biological Sciences, University of Southern California, 3616 Trousdale  
7 Parkway, Los Angeles, California, 90089, USA

8

9 **Abstract**

10 Biological effects of ultraviolet radiation (UVR; 280–400 nm) on marine primary  
11 producers are of general concern, as oceanic carbon fixers that contribute to the marine  
12 biological CO<sub>2</sub> pump are being exposed to increasing UV irradiance due to global  
13 change and ozone depletion. We investigated the effects of UV-B (280-320 nm) and  
14 UV-A (320-400 nm) on the biogeochemically-critical filamentous marine N<sub>2</sub>-fixing  
15 cyanobacterium *Trichodesmium* (strain IMS101) using a solar simulator as well as  
16 under natural solar radiation. Short exposure to UV-B, UV-A, or integrated total UVR  
17 significantly reduced the effective quantum yield of photosystem II (PSII) and  
18 photosynthetic carbon and N<sub>2</sub> fixation rates. Cells acclimated to low light were more  
19 sensitive to UV exposure compared to high-light grown ones, which had more UV  
20 absorbing compounds, most likely mycosporine-like amino acids (MAAs). After  
21 acclimation under natural sunlight, the specific growth rate was lower (by up to 44%),  
22 MAAs content was higher, and average trichome length was shorter (by up to 22%) in  
23 the full spectrum of solar radiation with UVR, than under a photosynthetically active  
24 radiation (PAR) alone treatment (400-700 nm). These results suggest that prior  
25 shipboard experiments in UV-opaque containers may have substantially overestimated  
26 in-situ nitrogen fixation rates by *Trichodesmium*, and that natural and anthropogenic

27 elevation of UV radiation intensity could significantly inhibit this vital source of new  
28 nitrogen to the current and future oligotrophic oceans.

## 29 **Introduction**

30 Global warming is inducing shoaling of the upper mixed layer and enhancing  
31 stratification, thus exposing phytoplankton cells which live in the upper mixed layer to  
32 higher depth-integrated irradiance (Häder and Gao, 2015). The increased levels of UV  
33 radiation have generated concern about their negative effects on aquatic living  
34 organisms, particularly phytoplankton, which require light for energy and biomass  
35 production.

36 Cyanobacteria are the largest and most widely distributed group of photosynthetic  
37 prokaryotes on the Earth, and they contribute markedly to global CO<sub>2</sub> and N<sub>2</sub> fixation  
38 (Sohm et al., 2011). Fossil evidence suggests that cyanobacteria first appeared during  
39 the Precambrian era (2.8 to 3.5 ×10<sup>9</sup> years ago) when the atmospheric ozone shield was  
40 absent (Sinha and Häder, 2008). Cyanobacteria have thus often been presumed to have  
41 evolved under more elevated UV radiation conditions than any other photosynthetic  
42 organisms, possibly making them better equipped to handle UV radiation.

43 Nevertheless, a number of studies have shown that UV-B not only impairs the  
44 DNA, pigmentation and protein structures of cyanobacteria, but also several key  
45 metabolic activities, including growth, survival, buoyancy, nitrogen metabolism, CO<sub>2</sub>  
46 uptake, and ribulose 1,5-bisphosphate carboxylase activity (Rastogi et al., 2014). To  
47 deal with UV stress cyanobacteria have evolved a number of defense strategies,  
48 including migration to escape from UV radiation, efficient DNA repair mechanisms,  
49 programmed cell death, the production of antioxidants, and the biosynthesis of UV-  
50 absorbing compounds, such as MAAs and scytonemin (Rastogi et al., 2014; Häder et  
51 al., 2015).

52 The non-heterocystous cyanobacterium *Trichodesmium* plays a critical role in the  
53 marine nitrogen cycle, as it is one of the major contributors to oceanic nitrogen fixation

54 (Capone et al., 1997) and furthermore is an important primary producer in the tropical  
55 and sub-tropical oligotrophic oceans (Carpenter et al., 2004). This global importance of  
56 *Trichodesmium* has motivated numerous studies regarding the physiological responses  
57 of *Trichodesmium* to environmental factors, including visible light, phosphorus, iron,  
58 temperature, and CO<sub>2</sub> (Kranz et al., 2010; Shi et al., 2012; Fu et al., 2014; Spungin et  
59 al., 2014; Hutchins et al., 2015). However, to the best of our knowledge, nothing has  
60 been documented about how UV exposure may affect *Trichodesmium*.

61 *Trichodesmium* spp. have a cosmopolitan distribution throughout much of the  
62 oligotrophic tropical and subtropical oceans, where there is a high penetration of solar  
63 UV-A and UV-B radiation (Carpenter et al., 2004). It also frequently forms extensive  
64 surface blooms (Westberry and Siegel, 2006), where it is presumably exposed to very  
65 high levels of UV radiation. Moreover, in the ocean, *Trichodesmium* populations may  
66 experience continuously changing irradiance intensities as a result of vertical mixing.  
67 Cells photoacclimated to reduced irradiance at lower depths might be subject to solar  
68 UVR damage when they are vertically delivered close to the sea surface due to mixing.  
69 Therefore, this unique cyanobacterium may have developed defensive mechanisms to  
70 overcome harmful effects of frequent exposures to intense UV radiation. Understanding  
71 how its N<sub>2</sub> fixation and photosynthesis respond to UV irradiance will thus further our  
72 knowledge of its ecological and biogeochemical roles in the ocean.

73 When estimating N<sub>2</sub> fixation using incubation experiments in the field, marine  
74 scientists have typically excluded UV radiation by using incubation bottles made of  
75 UV-opaque materials like polycarbonate (Capone et al., 1998; Olson et al., 2015). Thus,  
76 it seems possible that most shipboard measurements of *Trichodesmium* N<sub>2</sub> fixation rates  
77 could be overestimates of actual rates under natural UV exposure conditions in the  
78 surface ocean. In this study, *Trichodesmium* was exposed to spectrally realistic  
79 irradiances of UVR in laboratory experiments to examine the short-term effects of UVR  
80 on photosynthesis and N<sub>2</sub> fixation. In addition, *Trichodesmium* was grown under natural  
81 solar irradiance outdoors in order to assess UV impacts on longer timescales, and to test

82 for induction of protective mechanisms to ameliorate chronic UV exposure effects.

83

## 84 **Materials and methods**

85 **Study strategy** This study included two parts: (1) A short-term experiment under a  
86 solar stimulator (refer to Fig.S1 for the spectrum) to examine the responses of  
87 *Trichodesmium erythraeum* IMS 101 to a range of acute UV radiation exposures, and  
88 (2) A long-term UV experiment under natural sunlight to examine acclimated growth  
89 and physiology of *Trichodesmium* IMS 101. The first set of experiments was intended  
90 to mimic intense but transitory UV exposures, as might occur sporadically during  
91 vertical mixing, while the second set was intended to give insights into responses during  
92 extended near-surface UV exposures, such as during a surface bloom event.

93 **Short-term UV experiment** *Trichodesmium erythraeum* IMS101 strain was isolated  
94 from the North Atlantic Ocean (Prufert-Bebout et al., 1993) and maintained in  
95 laboratory stock cultures in exponential growth phase in autoclaved artificial seawater  
96 enrich with nitrogen free YBCII medium (Chen et al., 1996). For the short-term UV  
97 experiment, the cells were grown under low light (LL) 70  $\mu\text{mol photons m}^{-2} \text{ s}^{-1}$  and  
98 high light (HL) 400  $\mu\text{mol photons m}^{-2} \text{ s}^{-1}$  (12:12 light: dark) of PAR for at least 50  
99 generations (about 180 days) prior to the UV experiments. These two light levels  
100 represent growth sub-saturating and super-saturating levels for *Trichodesmium* (Cai et  
101 al., 2015). Cultures were grown in triplicate using a dilute semi-continuous culture  
102 method, with medium renewed every 4-5 days at 25°C. The cell concentration was  
103 maintained at  $< 5 \times 10^4 \text{ cell ml}^{-1}$ .

104 To determine the short-term responses of *Trichodesmium* IMS101 to UV radiation,  
105 subcultures of *Trichodesmium* IMS101 were dispensed at a final cell density of  $2-4 \times$   
106  $10^4 \text{ cells ml}^{-1}$  into containers that allow transmission of all or part of the UV spectrum,  
107 including 35 ml quartz tubes (for measurements of carbon fixation or measurements of  
108 fluorescence parameters), 100 ml quartz tubes (for pigment measurements), or 13 ml

109 gas-tight borosilicate glass vials (for N<sub>2</sub> fixation measurements). Three triplicated  
110 radiation treatments were implemented: (1) PAB (PAR+UV-A+UV-B) treatment,  
111 using tubes covered with Ultraphan film 295 (Digefra, Munich, Germany), thus  
112 receiving irradiances >295 nm; (2) PA (PAR+UV-A) treatment, using tubes covered  
113 with Folex 320 film (Montagefolie, Folex, Dreieich, Germany), and receiving  
114 irradiances >320 nm; and (3) P treatment: tubes covered with Ultraphan film 395 (UV  
115 Opak, Digefra), with samples receiving irradiances above 395 nm, representing PAR  
116 (400-700 nm). Since the transmission spectrum of the borosilicate glass was similar to  
117 that of Ultraphan film 295, the borosilicate glass vials for N<sub>2</sub> fixation measurements of  
118 PAB treatment were uncovered. Transmission spectra of these tubes (quartz and  
119 borosilicate) and the various cut-off foils used in this study are shown in Fig. S1.

120 The experimental tubes were placed under a solar simulator (Sol 1200W; Dr. Hönle,  
121 Martinsried, Germany) at a distance of 110 cm from the lamp, and maintained in a  
122 circulating water bath for temperature control (25°C) (CTP-3000, Eyela, Japan).  
123 Irradiance intensities were measured with a LI-COR 2π PAR sensor (PMA2100, Solar  
124 light, USA) that has channels for PAR (400-700 nm), UV-A (320-400 nm) and UV-B  
125 (280-320 nm). Measured values at the 110 cm distance were 87 Wm<sup>-2</sup> (PAR, ca. 400  
126 μmol photons m<sup>-2</sup> s<sup>-1</sup>), 28 Wm<sup>-2</sup> (UV-A) and 1 Wm<sup>-2</sup> (UV-B), respectively. For the  
127 fluorescence measurements, samples were exposed under a solar simulator for 60 min  
128 and measurements of fluorescence parameters were performed during the exposure (see  
129 below). Due to analytical sensitivity issues, for the carbon and N<sub>2</sub> incorporation  
130 measurements, the exposure duration was 2 hrs, and for the measurements of UVAC  
131 (UV-absorbing compounds) contents, the exposure time was 10 hrs.

132 **Long-term UV experiment** To assess the long-term effects of solar ultraviolet  
133 radiation on *Trichodesmium* IMS101, an outdoor experiment was carried during the  
134 winter (Jan 1<sup>st</sup> to Jan 26<sup>th</sup>, 2014) in subtropical Xiamen, China. 300-400 ml cell cultures  
135 were grown in 500 ml quartz vessels exposed to 100% daytime natural solar irradiance  
136 (surface ocean irradiance) (daytime PAR average of ~120W m<sup>-2</sup>, highest PAR at noon

137 ~300W m<sup>-2</sup>). All of the quartz vessels were placed in a shallow water bath at 25°C using  
138 a temperature control system (CTP-3000, Eyela, Japan). Two triplicated radiation  
139 treatments were implemented: (1) treatment P: PAR alone (400-700 nm), tubes covered  
140 with Ultraphan film 395 (UV Opak, Digefra); (2) treatment PAB: PAR+UV-A+UV-B  
141 (295-700 nm), unwrapped quartz tubes. Incident solar radiation was continuously  
142 monitored with a broadband Eldonet filter radiometer (Eldonet XP, Real Time  
143 Computer, Mdhrendorf, Germany) that was placed near the water bath. Daily doses of  
144 solar PAR, UV-A and UV-B during the experiments are shown in Fig. S2. The  
145 photoperiod during the outdoor incubation was 11:13 light:dark (light period from 7:00-  
146 18:00 of local time). Cells were maintained in exponential growth phase (cell density <  
147 5×10<sup>4</sup>), with dilutions (after sunset) every 4 days. All parameters were measured after  
148 acclimation under P or PAB radiation for a week.

149 Specific growth rate ( $\mu$ , d<sup>-1</sup>) of *Trichodesmium* IMS101 was determined based on  
150 the change in cell concentrations over 4 days during the 8-11<sup>th</sup> and 12-15<sup>th</sup> day using  
151 microscopic counts (Cai et al., 2015), the corresponding total dose from Day 8 to Day  
152 11 and from Day 12 to Day 15 were 17.03 and 18.51 MJ m<sup>-2</sup>, respectively. Chl *a* content  
153 was measured at the 11<sup>th</sup>, 15<sup>th</sup> and 19<sup>th</sup> day, and Chl *a*-specific absorption spectrum was  
154 measured at the 18<sup>th</sup> day. Carbon and N<sub>2</sub> fixation rate were measured at 11:00-13:00 on  
155 the 18<sup>th</sup> day; the diel solar irradiance record on that day is given in Fig. S3. In order to  
156 separate the respective effects of UV-A and UV-B on carbon and N<sub>2</sub> fixation, a shift  
157 experiment was carried out: subcultures from either P or PAB treatments were  
158 transferred into another P (PAR), PA (PAR+UV-A), PAB (PAR+UV-A+UV-B)  
159 treatment, which were marked as P', PA', PAB' treatments, respectively (namely P  
160 grown cells divided into P', PA', PAB' treatments; PAB grown cells also divided into P',  
161 PA', PAB' treatments). 35 ml quartz tubes and 13 ml gas-tight borosilicate glass vials  
162 were used for carbon and N<sub>2</sub> fixation measurements, respectively, as described below.  
163 Triplicate samples were used for each radiation treatment for carbon and N<sub>2</sub> fixation,  
164 and the incubations were performed under 100% solar irradiance for 2 hrs.

165 **Measurements and analyses**

166 **Effective photochemical quantum yield** During the exposure under the solar  
167 stimulator in the short-term experiment, small aliquots of cultures (2 ml) were  
168 withdrawn at time intervals of 3-10 min and immediately measured (without any dark  
169 adaptation) using a Pulse-Amplitude-Modulated (PAM) fluorometer (Xe-PAM, Walz,  
170 Germany). The quantum yield of PSII ( $F_V'/F_M'$ ) was determined by measuring the  
171 instant maximum fluorescence ( $F_M'$ ) and the steady state fluorescence ( $F_t$ ) under the  
172 actinic light. The maximum fluorescence ( $F_M'$ ) was determined using a saturating light  
173 pulse ( $4000 \mu\text{mol photons m}^{-2} \text{s}^{-1}$  in 0.8 s) with the actinic light level set at  $400 \mu\text{mol}$   
174  $\text{photons m}^{-2} \text{s}^{-1}$ , similar to the PAR level during the solar simulator exposure. The  
175 quantum yield was calculated as:  $F_V'/F_M' = (F_M' - F_t)/F_M'$  (Genty et al., 1989).

176 **Chlorophyll-specific absorption spectra and UV-absorbing compounds (UVACs)**

177 Chl *a*-specific absorption spectra were measured on the 18<sup>th</sup> day, after consecutive  
178 sunny days. Cellular absorption spectra were measured using the “quantitative filter  
179 technique” (Kiefer and SooHoo, 1982; Mitchell 1990). The cells were filtered onto GF/F  
180 glass fiber filters and scanned from 300 to 800 nm using a 1-nm slit in a  
181 spectrophotometer equipped with an integrating sphere to collect all the transmitted or  
182 forward-scattered light (i.e., light diffused by the filter and the quartz diffusing plate).  
183 Filters soaked in culture medium were used as blanks. Chlorophyll-specific absorption  
184 cross-sections ( $a^*$ ) were calculated according to Cleveland and Weidemann (1993) and  
185 Anning et al., (2000). Content of Chl *a* and UV-absorbing compounds (UVACs) were  
186 measured by filtering the samples onto GF/F filters and subsequently extracted in 4 mL  
187 of 100% methanol overnight in darkness at 4 °C. The absorption of the supernatant was  
188 measured by a scanning spectrophotometer (Beckman Coulter Inc., Fullerton, CA,  
189 USA). The concentration of Chl *a* was calculated according to Ritchie (2006). The main  
190 absorption values for UV-absorbing compounds ranged between wavelengths of 310  
191 and 360 nm, and the peak absorption value at 332 nm was used to estimate total  
192 absorptivity of UVACs according to Dunlap et al., (1995). The absorptivity of UVACs

193 was finally normalized to the Chl *a* content ( $\mu\text{g } (\mu\text{g Chl } a)^{-1}$ ).

194 *Trichodesmium* IMS101 UVACs content was compared to that of three other  
195 marine phytoplankton species, including *Chlorella*.sp, *Phaeodactylum tricornutum*,  
196 and *Synechococcus* WH7803, representing a green alga, a diatom and a unicellular  
197 cyanobacterium, respectively. All cultures were maintained under the same conditions  
198 ( $25^{\circ}\text{C}$ ,  $150 \mu\text{mol photons m}^{-2} \text{ s}^{-1}$ ) for several days prior to pigment extraction. The  
199 absorption spectra were measured by filtering the samples on GF/F filters that were  
200 subsequently extracted in 4 mL of 100% methanol overnight at  $4^{\circ}\text{C}$ . The absorption  
201 spectra of the supernatant were scanned from 250 to 800 nm in a spectrophotometer  
202 (Beckman Coulter Inc., Fullerton, CA, USA). The Optical Density (OD) values were  
203 then normalized to OD (662 nm), Chl *a* peak.

204 **Carbon fixation rates** Carbon fixation rate of both short- and long-term experiments  
205 were measured using the  $^{14}\text{C}$  method. A total of 20 ml samples were placed in 35 ml  
206 quartz tubes and inoculated with  $5\mu\text{Ci}$  (0.185 MBq) of labeled sodium bicarbonate (ICN  
207 Radiochemicals), and were then maintained under the corresponding radiation  
208 treatments for 2 hrs. After incubation, the cells were filtered onto Whatman GF/F filters  
209 ( $\Phi$  25 mm) and stored at  $-20^{\circ}\text{C}$  until analysis. To determine the radioactivity, the filters  
210 were thawed and then exposed to HCl fumes overnight and dried at  $60^{\circ}\text{C}$  for 4 hrs  
211 before being placed in scintillation cocktail (Hisafe 3, Perkin-Elmer, Shelton, CT, USA),  
212 and measured with a scintillation counter (Tri-Carb 2800TR, Perkin-Elmer, Shelton,  
213 CT, USA) as previously described (Cai et al., 2015).

214  **$\text{N}_2$  fixation rates** Rates of  $\text{N}_2$  fixation for both short- and long-term experiments were  
215 measured in parallel with the carbon fixation measurements using the acetylene  
216 reduction assay (ARA) (Capone et al., 1993). Samples of 5 ml subcultures were placed  
217 in 13 ml gas-tight borosilicate vials (described above), and 1ml acetylene was injected  
218 into the headspace before incubating for 2 hrs under the corresponding radiation  
219 treatment conditions. A 500  $\mu\text{l}$  headspace sample was then analyzed in a gas



220 chromatograph equipped with a flame-ionization detector and quantified relative to an  
221 ethylene standard. The ethylene produced was calculated using the Bunsen gas  
222 solubility coefficients according to Breitbarth et al., (2004) and an ethylene production  
223 to N<sub>2</sub> fixation conversion factor of 4 was used to derive N<sub>2</sub> fixation rates, which were  
224 then normalized to cell number.

225 **Data analysis** The inhibition of ΦPSII, carbon fixation and N<sub>2</sub> fixation due to UVR,  
226 UV-A, or UV-B was calculated as:

227 
$$\text{UVR-induced inhibition} = (I_P - I_{PAB})/I_P \times 100\%$$

228 
$$\text{UV-A-induced inhibition} = (I_P - I_{PA})/I_P \times 100\%$$

229 
$$\text{UV-B-induced inhibition} = \text{UVR}_{\text{inh}} - \text{UVA}_{\text{inh}}$$

230 where I<sub>P</sub>, I<sub>PA</sub>, I<sub>PAB</sub> indicate the values of carbon fixation or N<sub>2</sub> fixation in the P, PA  
231 and PAB treatments, respectively. Repair (r) and damage (k) rates during the 60 min  
232 exposure period in the presence of UV were calculated using the Kok model (Heraud  
233 and Beardall, 2000):

234 
$$P/P_{\text{initial}} = r/(r+k) + k/(r+k) \times \exp(-(r+k) \times t),$$

235 where P<sub>initial</sub> and P were the yield values at the beginning and at exposure time t.

236 Three replicates for culture conditions or each radiation condition was used in all  
237 experiments, and the data are plotted as mean and standard deviation values. Two way  
238 ANOVA tests were used to determine the interaction between culture conditions and  
239 UVR at a significance level of p=0.05.

240

## 241 **Results**

242 **Short-term UV experiment** The effects of acute UVR exposure on cells grown under  
243 LL and HL conditions are shown in Fig.1. For the cells grown under LL condition, the  
244 F<sub>V</sub>'/F<sub>M</sub>' declined sharply within 10 min after first exposure in all radiation treatments,

245 and then leveled off.  $F_V'/F_M'$  decreased less in the samples receiving PAR alone (to 43%  
246 of the initial value) than those additionally receiving UV-A (to 30% of the initial value)  
247 or UV-A+UV-B (to 24% of the initial value) (Fig.1A). The  $F_V'/F_M'$  value of PA and  
248 PAB treatments were significantly lower compared to the PAR treatment ( $p=0.03$  and  
249  $p<0.01$ , respectively).  $F_V'/F_M'$  of HL grown cells declined less and more slowly  
250 compared to the LL grown cells. The  $F_V'/F_M'$  of HL cells under PAR alone remained  
251 more or less constant during the exposure, since the PAR level was similar to the growth  
252 level of HL ( $400 \mu\text{mol photons m}^{-2} \text{ s}^{-1}$ ). In contrast, the  $F_V'/F_M'$  decreased to 75% and  
253 65% of its initial value for the PA and PAB treatment, respectively, and were  
254 significantly lower than the PAR treatment ( $p<0.01$ ) (Fig.1B).

255 The damage and repair rates of the PSII reaction center estimated from the  
256 exponential decay in the effective quantum yield showed higher damage and lower  
257 repair rates in the LL-grown cells than in the HL-grown ones (Fig.1C,D). The PSII  
258 damage rates ( $k$ ,  $\text{min}^{-1}$ ) of LL grown cells were 0.14, 0.16 and  $0.15 \text{ min}^{-1}$  in the P, PA  
259 and PAB treatments, respectively, about 2 times faster than in the cells grown under HL  
260 conditions (Fig.1C). The PSII repair rates ( $r$ ,  $\text{min}^{-1}$ ) of LL grown cells were 0.1, 0.06  
261 and  $0.05 \text{ min}^{-1}$  in the P, PA and PAB treatments, which were 83% ( $p<0.01$ ), 33% ( $p<0.01$ )  
262 and 54% ( $p<0.01$ ) lower than in HL grown cells, respectively (Fig.1D). The damage  
263 rate was not significantly different among P, PA and PAB treatments within either of  
264 the LL- and HL-grown treatments ( $p>0.05$ ), but the repair rate was much higher in the  
265 P treatment without UV than in PA or PAB treatments in the HL-grown cells ( $p<0.01$ ).

266 The photosynthetic carbon fixation and  $\text{N}_2$  fixation rates during the UV exposure  
267 are shown in Fig. 2. The HL-grown cells had 17% higher photosynthetic carbon fixation  
268 rates than the LL-grown ones under the PA treatment ( $p<0.01$ ), however, the LL and  
269 HL-grown cells didn't show significant differences in carbon fixation rates under the P  
270 and PAB treatments ( $p=0.29$ , and  $p=0.06$ ). In the presence of UV radiation, carbon  
271 fixation was significantly inhibited in both LL and HL-grown cells (Fig.2A). Carbon  
272 fixation inhibition induced by UV-A was about 35-45%, much larger than that induced

273 by UV-B, which caused only about a 10% inhibition of carbon fixation ( $p < 0.01$ ). The  
274 UV-A exposed carbon fixation rate was significantly higher in the LL- grown cells than  
275 in HL grown cells ( $p < 0.01$ ), while UV-B did not cause a significant difference in  
276 inhibition between the HC- and LC-grown cells ( $p = 0.88$ ) (Fig. 2B).  $N_2$  fixation rates  
277 were about twofold higher in HL-grown cells in all radiation treatments (Fig. 2C,  
278  $p < 0.01$ ), but the UV-induced  $N_2$  fixation inhibition showed no significant differences  
279 between the LL and HL grown cells regardless of UV-A or UV-B exposures (Fig. 2D,  
280  $p = 0.80, 0.62, 0.39$  for UVA-, UVB-, and UVR-induced inhibition, respectively).

281 Compared to other phytoplankton under the same growth conditions,  
282 *Trichodesmium* IMS101 had much higher absorbance in the UV region (300-400 nm)  
283 (Fig. 3A). In this study, the absorbance at 332 nm of HL-grown cells was about twofold  
284 higher compared to LL-grown ones (Fig. 3B). However, the cellular Chl *a* content (data  
285 not shown) and UVACs contents of both LL and HL grown cells did not change after  
286 exposure to UV for 10 hrs (Fig. 3C).

287 **Long-term UV experiment** After being acclimated under full natural solar radiation  
288 for 7 days, the specific growth rates of cells grown under the PAB treatment were  
289  $0.15 \pm 0.01$  and  $0.14 \pm 0.06$  during the 8-11<sup>th</sup> day and 12-15<sup>th</sup> day periods, respectively.  
290 These growth rates were significantly lower by 44% and 39% compared to cells grown  
291 under the P treatment, respectively (Fig. 4A,  $p = 0.014$  and  $p = 0.03$ ). The mean trichome  
292 lengths of PAR treatment cells on the 11<sup>th</sup> and 15<sup>th</sup> day were  $758 \pm 56$  and  $726 \pm 19$   $\mu\text{m}$ ,  
293 while addition of UVR significantly reduced the trichome length by 22% (Day 11<sup>th</sup>,  
294  $p = 0.02$ ) and 11% (Day 15<sup>th</sup>,  $p = 0.02$ ).

295 Analysis of the Chl *a* specific absorption spectra,  $a^*(\lambda)$ , demonstrated that UVR  
296 had a major effect on the absorbance of UV regions and phycobilisomes (Fig. 5). The  
297 optical absorption spectra revealed a series of peaks in the UV and visible wavelengths  
298 corresponding to the absorption peaks of UVACs at 332 nm, Chl *a* at 437 and 664 nm,  
299 phycourobilin (PUB) at 495 nm, phycoerythrobilin (PEB) at 545 nm,

300 phycoerythrocyanin (PEC) at 569 nm, and phycocyanin (PC) at 627 nm. In the UV  
301 region, the  $a^*(\lambda)$  value was higher in the PAB treatment cultures than in the P treatment  
302 cultures (Fig. 5). The UVR treatments did not show clear effects on Chl *a* content  
303 compared to acclimation to PAR alone measured on different days (Fig. S3). However,  
304 the ratio of UVACs to Chl *a* was increased by 41% in the PAB compared to the P  
305 treatment ( $p < 0.01$ ).

306 The cells grown in the long-term P and PAB treatments showed different responses  
307 for carbon and N<sub>2</sub> fixation after being transferred to short-term P', PA', and PAB'  
308 radiation treatments at noon on the 18<sup>th</sup> day (Fig. 6). P and PAB acclimated cells did  
309 not show significant differences in carbon fixation among all short-term P', PA', PAB'  
310 treatments (Fig. 6A,  $p = 0.17$ ,  $p = 0.22$ ,  $p = 0.51$ , respectively), nor in the UV-induced  
311 inhibition of carbon fixation (Fig. 6B,  $p > 0.05$ ). However, long-term UV-A exposure  
312 inhibited short-term carbon fixation by about 58% in both the P and the PAB treatments,  
313 significantly higher than that induced by UV-B radiation (Fig. 6B,  $p < 0.01$ ).

314 N<sub>2</sub> fixation rates of P acclimated cells were significantly higher than PAB  
315 acclimated cells in all P', PA', and PAB' treatments (Fig. 6C,  $p < 0.01$ ). The N<sub>2</sub> fixation  
316 inhibition induced by UV-A of PAB acclimated cells was 49%, significantly higher by  
317 47% than that of P acclimated cells ( $p = 0.03$ ), while there was no significant difference  
318 in UVB-induced N<sub>2</sub> fixation inhibition between P and PAB acclimated cells (Fig. 6D,  
319  $p = 0.62$ ). The carbon fixation rates measured under PAR (PAR treated cells to P') and  
320 PAB (PAB treated cells to PAB') conditions were 89.2 and 47.1 fmol C cell<sup>-1</sup> h<sup>-1</sup>,  
321 respectively, while N<sub>2</sub> fixation rates measured under those conditions were 1.9 and 0.5  
322 fmol N<sub>2</sub> cell<sup>-1</sup> h<sup>-1</sup>. UVR exposure lowered estimates of carbon and N<sub>2</sub> fixation rates by  
323 47% and 65%, respectively.

324

## 325 Discussion

326 Our study shows that growth, photochemistry, photosynthesis and N<sub>2</sub> fixation in

327 *Trichodesmium*.sp are all significantly inhibited by UVR, including both UV-A and UV-  
328 B. These effects occur in both short-term, acute exposures, as well as after extended  
329 exposures during acclimated growth. These results are ecologically relevant, since this  
330 cyanobacterium is routinely exposed to elevated solar irradiances in its tropical habitat  
331 either transiently, during vertical mixing, or over longer periods during surface blooms.  
332 *Trichodesmium* provides a biogeochemically-critical source of new N to open ocean  
333 food webs, so significant UV inhibition of its growth and N<sub>2</sub> fixation rates could have  
334 major consequences for ocean biology and carbon cycling.

335 Short exposure to UVR causes a significant decline in the quantum yield of  
336 photosystem II (PSII) fluorescence of *Trichodesmium*, that is consistent with damage  
337 to critical PSII proteins such as D1 in a brackish water cyanobacterium *Arthrospira*  
338 (*Spirulina*) *platensis* (Wu et al., 2011). UV-induced degradation of D1 proteins results  
339 in inactivation of PSII, leading to reduction in photosynthetic activity (Campbell et al.,  
340 1998). In addition, studies of various microbial mats have shown that Rubisco activity  
341 and supply of ATP and NADPH are inhibited under UV exposure, which might also  
342 lead to the reduction in photosynthetic carbon fixation (Cockell and Rothschild, 1999;  
343 Sinha et al., 1996, 1997).

344 Exposure to UVR had an impact on nitrogenase activity in *Trichodesmium*, since  
345 both the short- and the long-term UV exposure led to significant reduction of N<sub>2</sub> fixation  
346 of up to 30% (short-term) or ~60% (long-term) (Fig. 2D and 6D). Studies on the  
347 freshwater cyanobacterium *Anabaena*. sp. showed a 57% decline in N<sub>2</sub> fixation rate  
348 after 30min exposure to UVR of 3.65W (Lesser, 2007). Some rice-field cyanobacteria  
349 completely lost N<sub>2</sub> fixation activity after 25-40 min exposure to UV-B of 2.5 W (Kumar  
350 et al., 2003). In our results, long-term exposure to UV led to higher inhibition of N<sub>2</sub>  
351 fixation, implying that accumulated damage to the key N<sub>2</sub>-fixing enzyme, nitrogenase,  
352 could have occurred during the growth period under solar radiation in the presence of  
353 UVR.

354 Compared to N<sub>2</sub> fixation, UVR induced an even higher degree of inhibition of  
355 carbon fixation. The carbon fixation rate decreased by 50% in the presence of UVR.  
356 UV-A induced higher inhibition than UV-B, indicating that although UV-B photons  
357 (295-320 nm) are in general more energetic and damaging than UV-A (320-400 nm),  
358 the greater fluxes of UV-A caused more inhibition of carbon fixation, which was  
359 consistent with other studies of spectral dependence of UV effects (Cullen and Neale  
360 1994; Neale 2000). This finding is ecologically significant, since UV-A penetrates  
361 much deeper into clear open ocean and coastal seawater than does UV-B.

362 Compared to low light-grown cells, the high light-grown ones were more resistant  
363 to UVR, which was reflected in the lower PSII damage rate and faster recovery rate in  
364 the presence of UVR, as well as the significantly lower levels of carbon fixation  
365 inhibition caused by UV-A and/or UV-B. Such a reduced sensitivity to UVR coincided  
366 well with a significant increase in UV-absorbing compounds in the HL-grown cells  
367 compared to the LL-grown ones. Similar dependence of photosynthetic sensitivity to  
368 UV inhibition on growth light levels has been reported in other species of  
369 phytoplankton (Litchman and Neale, 2005; Sobrino and Neale, 2007). A red-tide  
370 dinoflagellate *Gymnodinium sanguineum* Hirasaka accumulates 14-fold MAAs in  
371 high-light grown cells (76 W m<sup>-2</sup>) than in low-light grown ones (15 W m<sup>-2</sup>) and the  
372 former ones have lower sensitivity to UV radiation at wavelengths strongly absorbed  
373 by the MAAs (Neale et al., 1998). The sensitivity of PSII quantum yield to UV exposure  
374 in *Synechococcus* WH7803 was also less in high-light-grown versus low-light-grown  
375 cells (Garczarek et al., 2008). In addition, it has been observed that phytoplankton from  
376 turbid waters or acclimated to low-light conditions are more sensitive to UVR than  
377 those from clear waters (Villafane et al., 2004; Litchman and Neale, 2005; Helbing et  
378 al., 2015). These observations suggest that *Trichodesmium* sp. may acclimate to growth  
379 in the upper mixed layer by producing UV-absorbing compounds, making them more  
380 tolerant of UVR than cells living at deeper depths.

381 Although UV radiation can clearly cause damage to PSII and inhibit physiological

382 processes in *Trichodesmium* sp., this cyanobacterium has evolved protective  
383 biochemical mechanisms to deal with UV radiation in their natural high-UV habitat.  
384 One important class of UV-absorbing substances are mycosporine-like amino acids  
385 (MAAs) and scytonemin. These compounds strongly absorb in the UV-A and/or UV-B  
386 region of the spectrum, and dissipate its energy as heat without forming reactive oxygen  
387 species, protecting the cells from UV and from photooxidative stress (Banaszak 2003).  
388 The “mycosporine-like amino acids” (MAAs), which have strong UV-absorption  
389 maxima between 310 and 362 nm (Sinha and Häder, 2008) as identified by HPLC in  
390 other studies, consist of a group of small, water-soluble compounds, including asterina-  
391 332 ( $\lambda_{\max}=332$ ) and shinorine ( $\lambda_{\max}=334$ ), which are the most abundant, as well as  
392 mycosporine-glycine ( $\lambda_{\max}=310$ ), porphyra-334 ( $\lambda_{\max}=334$ ), and palythene  
393 ( $\lambda_{\max}=360$ ) (Shick and Dunlap 2002; Subramaniam et al., 1999). As was found  
394 previously in *Trichodesmium* spp., high absorbance in the UV region is mainly due to  
395 the presence of “mycosporinlike amino acids” (MAAs), with absorbance maxima  
396 between 310~362 nm (Sinha and Häder, 2008).

397 Our investigation strongly suggests that *Trichodesmium* is able to synthesize  
398 MAAs ( $\lambda_{\max} \sim 330$  nm and 360 nm) in response to elevated PAR and UV radiation.  
399 Synthesis of MAAs has been reported to be stimulated by high PAR and UV radiation  
400 in other phytoplankton (Karsten et al., 1998; Vernet and Whitehead, 1996; Sinha et al.,  
401 2001). Our high light-grown cells were more tolerant of UVR, likely at least partly due  
402 to their ability to synthesize double the amount of MAAs in comparison to low light-  
403 grown ones (Fig.3B). It has been showed that accumulation of MAAs may represent a  
404 natural defensive system against exposure to biologically harmful UV radiation  
405 (Karsten et al., 1998) and cells with high concentrations of MAAs are more resistant to  
406 UVR than cells with small amounts of these compounds (Garcia-Pichel and Castenholz,  
407 1993). In fact, MAAs concentrations varying between 0.9 and 8.4  $\mu\text{g mg (dry weight)}^{-1}$   
408 <sup>1</sup> have been measured in cyanobacterial isolates (Garcia-Pichel and Castenholz, 1993),  
409 and ratios of MAAs to Chl *a* in the range from 0.04 to 0.19 have been reported in

410 cyanobacterial mats (Quesada et al., 1999). In our study, we found that *Trichodesmium*  
411 contained a much higher concentration of MAAs (the highest value in HL-grown cells  
412 is 5 pg cell<sup>-1</sup>) and that the ratio of these compounds to Chl *a* was 5, was consisted with  
413 previous reports in regard to *Trichodesmium* (Subramaniam et al., 1999), which is much  
414 higher than in other phytoplankton. This adaptation could be a major reason for the  
415 ability of *Trichodesmium* to grow and form extensive surface blooms under strong  
416 irradiation in the oligotrophic oceans.

417 In our study, no significant changes in the amount of MAAs were observed after  
418 10 h of exposure to UVR under the solar simulator. In contrast, a significant increase  
419 of 23% in the concentration of MAAs was observed in full solar spectrum treated cells  
420 compared to PAR-treated ones grown outdoors after consecutive sunny days (on the  
421 18<sup>th</sup>). It seems that the synthesis of MAAs takes a relatively long time. Other studies  
422 have shown the time required for induction of MAAs in other cyanobacteria is  
423 dependent on UV doses and species, and shows a circadian rhythm (Sinha et al., 2001;  
424 Sinha et al., 2003).

425 Not only did long-term exposure to high solar UV radiation significantly reduce  
426 *Trichodesmium*'s growth rate (by 37~44%), but it also significantly shortened its  
427 average trichome length (less cell per filament) (Fig. 4). The decreased growth rates  
428 correlated with decreased trichome length are consistent with our previous studies  
429 under different light levels without UVR (Cai et al., 2015). It has been reported that  
430 enhanced UVR is one of the environmental factors that not only inhibit the growth of  
431 cyanobacteria, but also change their morphology (Rastogi et al., 2014). Natural solar  
432 UVR can suppress formation of heterocysts and shorten the filament length of  
433 *Anabaena* sp. PCC7120 (Gao et al., 2007). Natural levels of solar UVR in the Southern  
434 China were also found to break the filaments and alter the spiral structure of *Arthrospira*  
435 (*Spirulina*) *platensis*, with a compressed helix that lessens UV exposures for the cells  
436 (Wu et al., 2005). Cells in the trichomes of the estuarine cyanobacterium *Lyngbya*  
437 *aestuarii* coil and then form small bundles in response to UV-B irradiation (Rath and



438 Adhikari, 2007). However, the shortened trichomes of *Trichodesmium* in this work may  
439 be a result of UV-inhibited growth rather than a responsive strategy against UV.

440 Carbon fixation in the long-term experiment showed similar patterns with the  
441 short-term UV experiment, demonstrating that UV-A played a larger role in inhibiting  
442 carbon fixation than UV-B. Since the ratio of UV-B to UV-A is lower in natural solar  
443 light (1:50) than under our artificial UVR (1:28), the inhibitory effects of UV-B were  
444 smaller compared to UV-A in the cultures under sunlight. Carbon fixation and N<sub>2</sub>  
445 fixation rates measured outdoors indicated that UV-induced carbon fixation inhibition  
446 recovers quickly following transfer to PAR conditions, while the UV-induced N<sub>2</sub>  
447 fixation inhibition does not (Fig.6AC). Factors that might be responsible include lower  
448 turnover rate of nitrogenase than that of RuBisco; more UV-induced damage to  
449 nitrogenase with lower efficiency of repair (Kumar et al., 2003); and indirect harm  
450 caused by ROS (Reactive Oxygen Species) induced by UV (Singh et al., 2014).

451 The UV effects in our study were measured under conditions that minimized self-  
452 shading, namely during growth as single filaments. However, in its natural habitat  
453 *Trichodesmium* often grows in a colonial form, with packages of many cells held  
454 together by an extracellular sheath (Capone et al., 1998). In such colonial growth forms,  
455 the effective cellular pathlengths for UV radiation are likely greatly increased, thereby  
456 amplifying the overall sunscreen factor for the colony. *Trichodesmium*.spp might use  
457 this colony strategy to protect themselves from natural UV damage in the ocean.

458 Our investigation shows that this cyanobacterium appears to have evolved the  
459 ability to produce exceptionally high levels of UV protective compounds, likely  
460 mycosporine-like amino acids. However, even this protective mechanism is insufficient  
461 to prevent substantial inhibition of nitrogen and carbon fixation in the high-irradiance  
462 environment where this genus lives. *Trichodesmium* spp are distributed in the upper  
463 layers of the euphotic zone in oligotrophic waters, and its population densities are  
464 generally greatest at relatively shallow depths (20 to 40 m) in the upper water column

465 (Capone et al., 1997). It seems likely that UV inhibition therefore significantly reduces  
466 the amount of critical new nitrogen supplied by *Trichodesmium* to the N-limited  
467 oligotrophic gyre ecosystems, a possibility that has not been generally considered in  
468 regional or global models of the marine nitrogen cycle. On the other hand, the UV  
469 absorbing compounds (most likely MAAs) are expensive to make in terms of nitrogen  
470 in particular (Singh et al., 2008). Decreased nitrogen supplied may increase sensitivity  
471 of phytoplankton assemblages to UV further (Litchman et al 2002), thus potentially  
472 creating a positive feedback between N-limitation and the UV sensitivity.

473 *Trichodesmium* can form dense, extensive blooms in the surface oceans, and a  
474 frequently cited estimate of global nitrogen fixation rates by *Trichodesmium* blooms is  
475  $\sim 42 \text{ Tg N yr}^{-1}$  (Westberry et al., 2006). Previous biogeochemical models of global  $\text{N}_2$   
476 fixation have emphasized controls by many environmental factors, including solar PAR  
477 radiation, temperature, wind speed, and nutrient concentrations (Luo et al., 2014), but  
478 have largely neglected the effects of UV radiation. When estimating  $\text{N}_2$  fixation using  
479 incubation experiments in the field, however, marine scientists have typically excluded  
480 UV radiation by using incubation bottles made of UV-opaque materials like  
481 polycarbonate (Olson et al., 2015). Our results suggest that under solar radiation at the  
482 surface ocean, including realistic levels of UVR inhibition lowers estimates of carbon  
483 fixation and  $\text{N}_2$  fixation by around 47% and 65%, respectively (Fig.6).

484 Thus, it seems likely that shipboard measurements and possibly current model  
485 projections of *Trichodesmium*  $\text{N}_2$  fixation and primary production rates that do not take  
486 into account UV inhibition could be substantial overestimates. However, our study was  
487 only carried out under full solar radiation, simulating sea surface conditions, so further  
488 studies are needed to investigate depth-integrated UV inhibition. Moreover, the  
489 response to UV radiation may be taxon-specific. For example, unicellular  $\text{N}_2$ -fixing  
490 cyanobacteria such as the genus *Crocospaera*, with smaller cell size and thus greater  
491 light permeability, may be more vulnerable to UV radiation than *Trichodesmium* (Wu  
492 et al., 2015). In the future, as enhanced stratification and decreasing mixed layer depth

493 expose cells to relatively higher UV levels, differential sensitivities to UV radiation  
494 may result in changes in diazotroph community composition. Such UV-mediated  
495 assemblage shifts could have potentially major consequences for marine productivity,  
496 and for the global biogeochemical cycles of nitrogen and carbon.

497

#### 498 **Acknowledgements**

499 This study was supported by the National Key Research Programs 2016YFA0601400  
500 and National Natural Science Foundation (41430967; 41120164007) to KSG, and by  
501 U.S. National Science Foundation grants OCE 1260490 and OCE 1538525 to F-X.F.  
502 and D.A.H. DAH and F-X.F.'s visit to Xiamen was supported by MEL's visiting  
503 scientists programs. The authors would like to thank Nana Liu and Xiangqi Yi from  
504 Xiamen University for their kind assistance during the experiments.

505

506

507

508

509

510

511

512

513

514

515

516

517

518

519

520 **Figures**

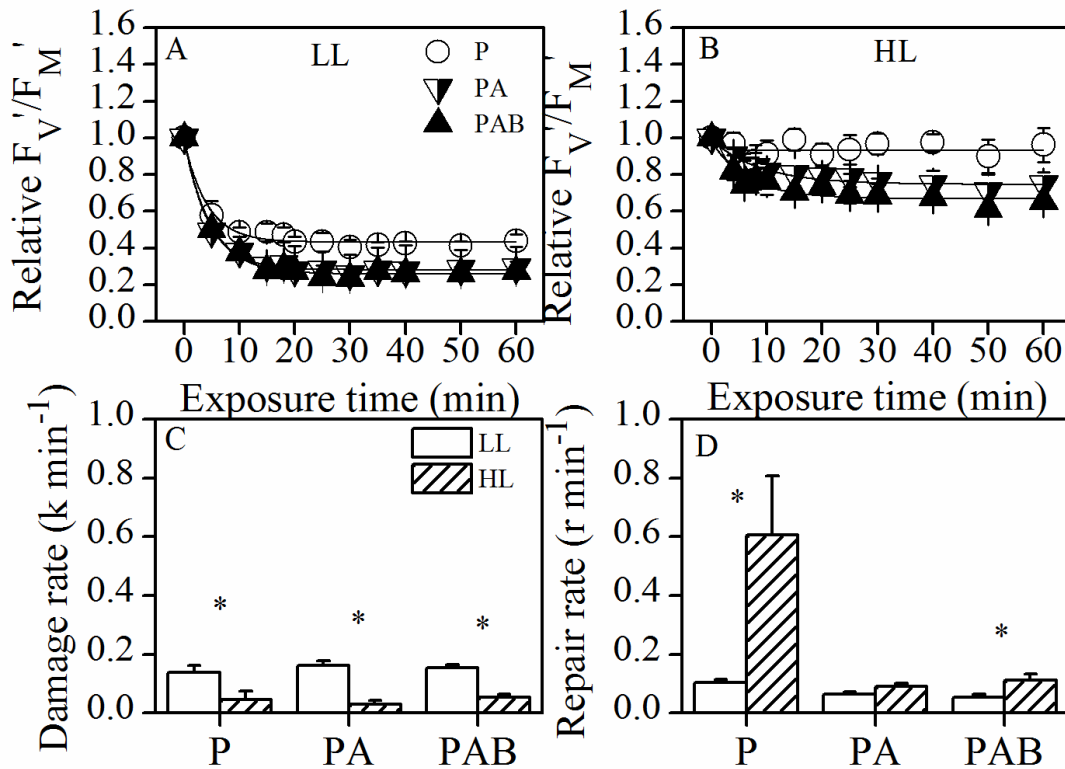

521

522 Fig.1 Changes of effective quantum yield ( $F_v'/F_m'$ ) of *Trichodesmium* IMS101 grown

523 under (A) LL and (B) HL conditions while exposed to PAR (P), PAR+UVA (PA) and

524 PAR+UVA+UVB (PAB) under solar stimulator for 60 min. PSII damage (C;  $k$ , in  $\text{min}^{-1}$

525  $^{-1}$ ) and repair rates (D;  $r$ , in  $\text{min}^{-1}$ ) of LL- and HL-grown cells were derived from the

526 yield decline curve in the upper panels. Asterisks above the histogram bars indicate

527 significant differences between LL- and HL-grown cells. Values are the mean  $\pm$ SD,

528 triplicate incubations.

529

530

531

532

533

534

535

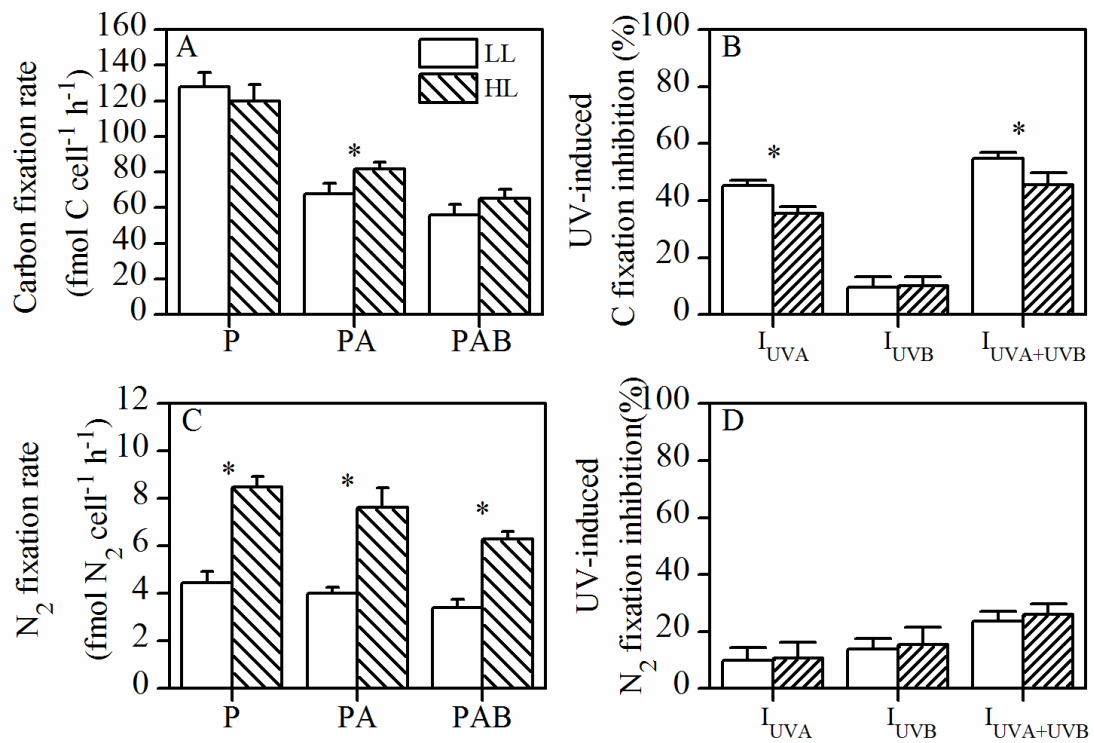

536

537 Fig.2 Photosynthetic carbon fixation rate (A; fmol C cell<sup>-1</sup> h<sup>-1</sup>) and UV-induced C  
 538 fixation inhibition (B), N<sub>2</sub> fixation rate (C; fmol N<sub>2</sub> cell<sup>-1</sup> h<sup>-1</sup>) and corresponding UV-  
 539 induced N<sub>2</sub> fixation inhibition (D) of *Trichodesmium* IMS101 grown under LL and HL  
 540 conditions. Asterisks above the histogram bars indicate significant differences between  
 541 LL- and HL-grown cells. Values are the mean ±SD, triplicate incubations.

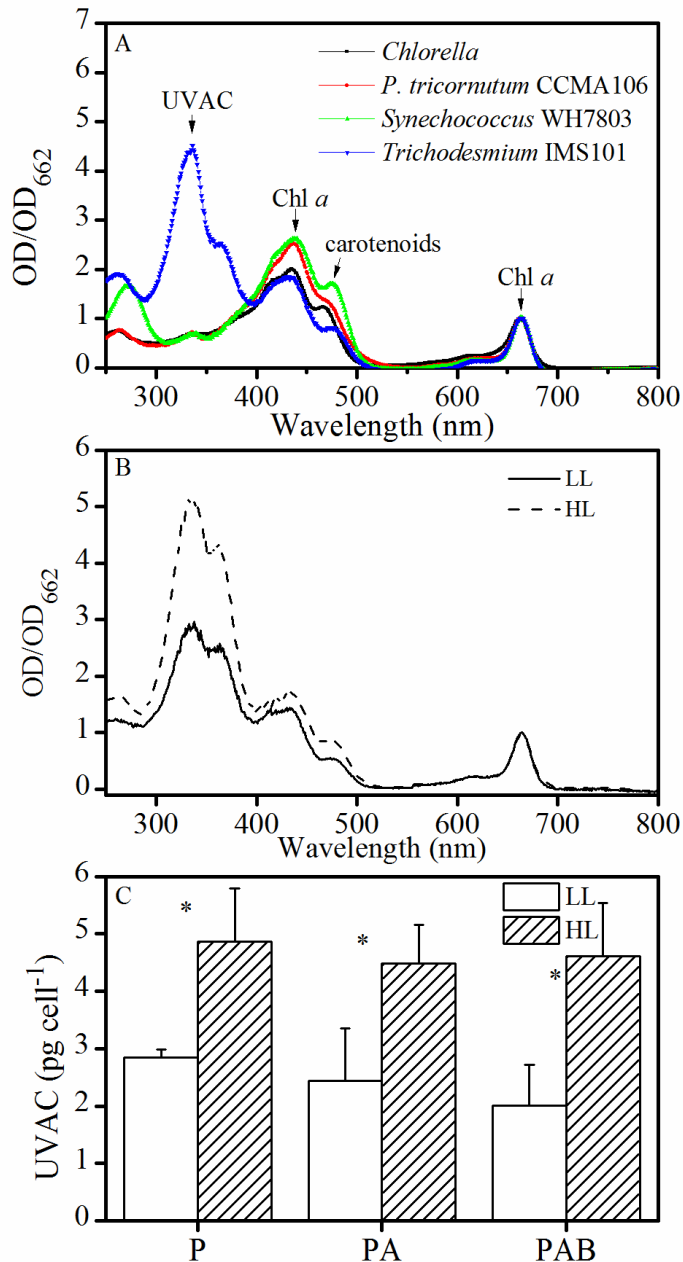

542

543 Fig.3 (A) Absorption spectrum of *Trichodesmium* IMS101 compared to other  
 544 phytoplankton. Pigments were extract by 100% methanol. OD value normalized to  
 545 OD<sub>662</sub> (Chl *a*). (B) Absorption spectrum of the *Trichodesmium* IMS101 grown under  
 546 LL and HL conditions, OD value normalized to OD<sub>662</sub> (Chl *a*). (C) Cellular contents of  
 547 UVACs of *Trichodesmium* IMS101 grown under LL and HL conditions after exposure  
 548 to PAR (P), PAR+UVA (PA), PAR+UVA+UVB (PAB) under solar stimulator for 10 h.  
 549 Asterisks above the histogram bars indicate significant differences between LL- and  
 550 HL-grown cells. Values are the mean  $\pm$ SD, triplicate incubations.

551

552

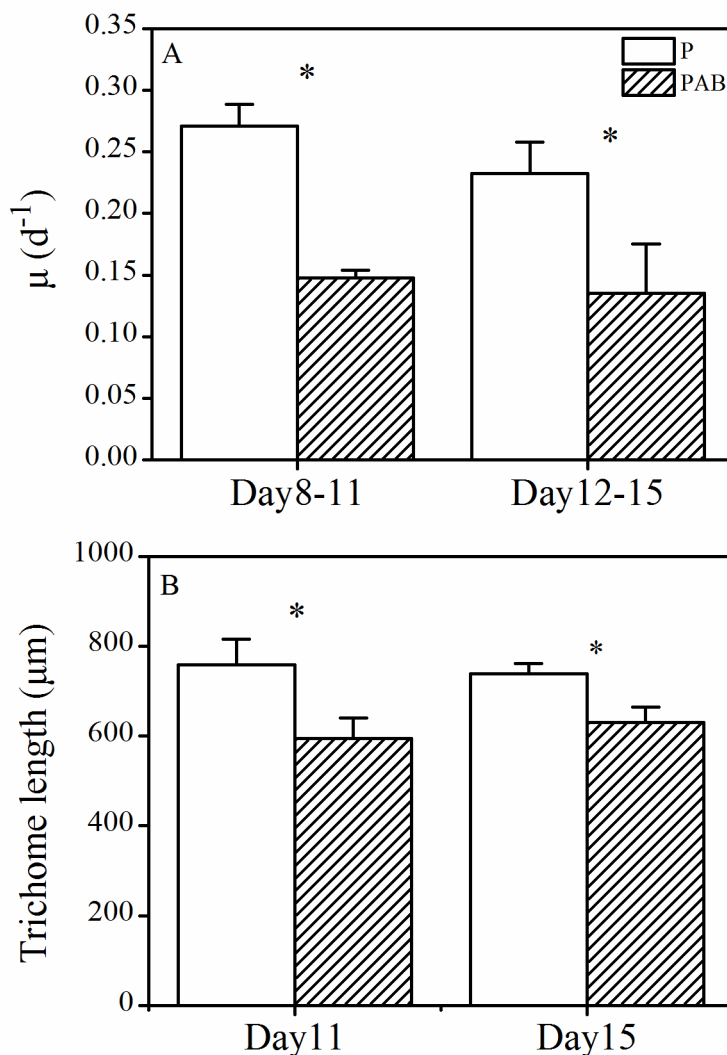

553

554 Fig.4 (A) Specific growth rate (measured during 8<sup>th</sup>-11<sup>th</sup> and 12<sup>th</sup>-15<sup>th</sup> day) of  
555 *Trichodesmium* IMS101 grown under solar PAR (P) and PAR+UVA+UVB (PAB).

556 Corresponding total solar doses from Day 8 to Day 11 and from Day 12 to Day 15 were

557 17.03 and 18.51 MJ, respectively. (B) Trichome length (measured on the 11<sup>th</sup> and 15<sup>th</sup>

558 day) of *Trichodesmium* IMS101 grown under solar PAR (P) and PAR+UVA+UVB

559 (PAB). The asterisks indicate significant differences between radiation treatments.

560 Values are the mean  $\pm$ SD, triplicate cultures.

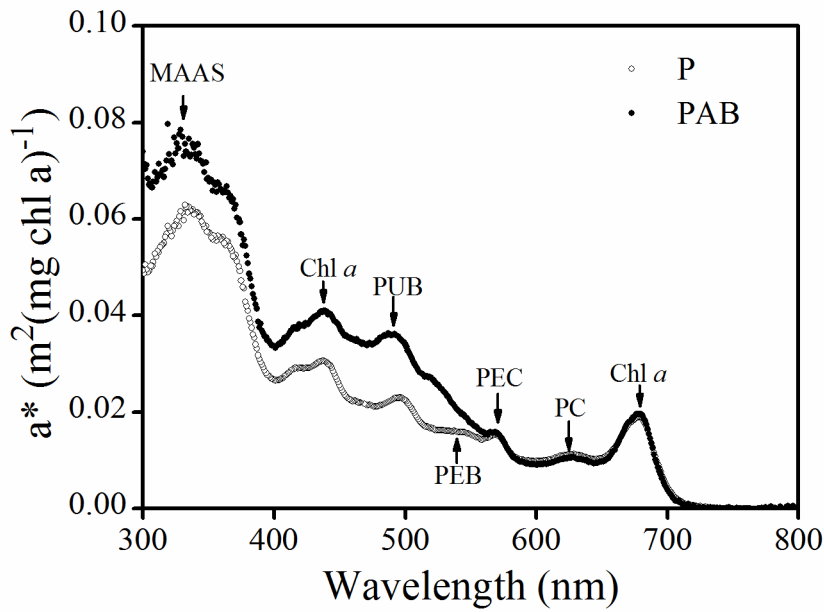

561

562 Fig.5 Chl *a* specific absorption spectrum ( $a^*$ ) of *Trichodesmium* IMS101 grown under  
 563 solar PAR (P) and PAR+UVA+UVB (PAB). The measurements were taken on the 18<sup>th</sup>  
 564 day. The absorption peaks of MAAs (330 nm), PUB (495 nm), PEB (545 nm), PEC  
 565 (569 nm), PC (625nm) and Chl *a* (438 and 664 nm) are indicated.

566

567

568

569



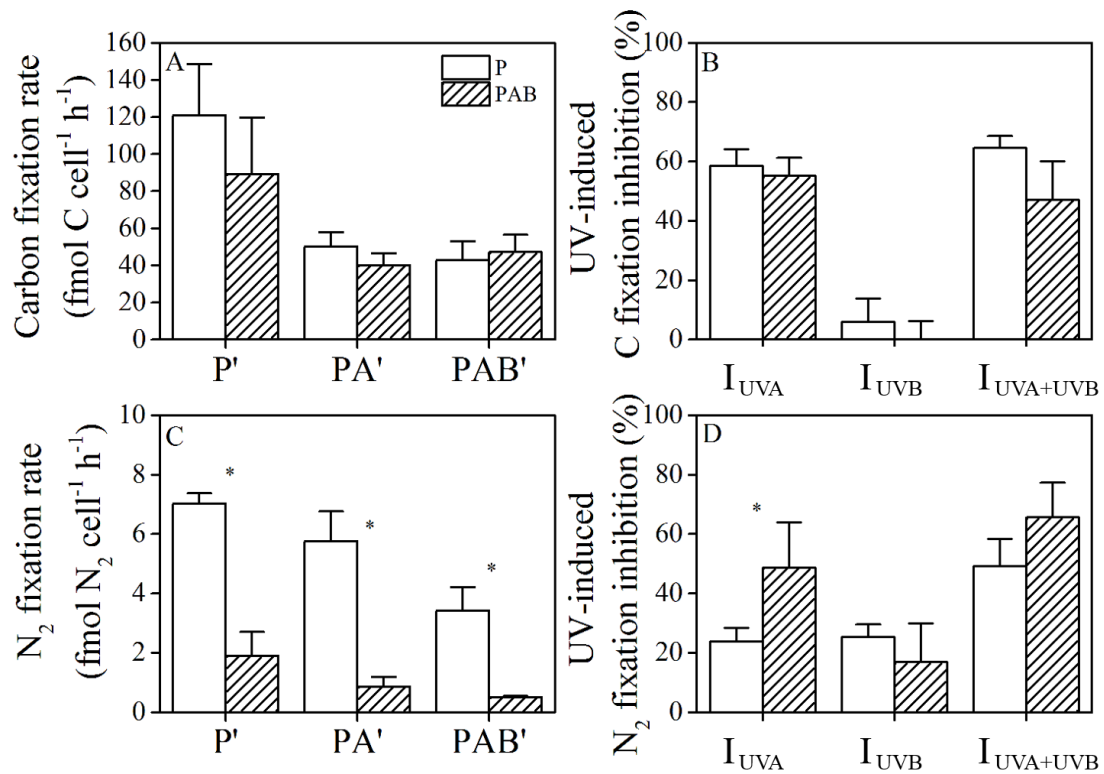

570

571 Fig. 6 Photosynthetic carbon fixation rate (A; fmol C cell<sup>-1</sup> h<sup>-1</sup>) and UV-induced C  
 572 fixation inhibition (B), N<sub>2</sub> fixation rate (C; fmol N<sub>2</sub> cell<sup>-1</sup> h<sup>-1</sup>) and corresponding UV-  
 573 induced N<sub>2</sub> fixation inhibition (D) of *Trichodesmium* IMS101 grown under solar PAR  
 574 (P) and PAR+UVA+UVB (PAB) transferred to another P', PA', PAB' treatments. The  
 575 measurement was taken on the 18<sup>th</sup> day at 11:00~13:00. Asterisks above the histogram  
 576 bars indicate significant differences between P and PAB treatments. Values are the mean  
 577 ±SD, triplicate incubations.

578

579

580

581

582

583

584

585

586

587

588 **References**

- 589 1. Anning, T., MacIntyre, H. L., Sammes, S. M. P. a. P. J., Gibb, S., and Geider, R. J.:  
590 Photoacclimation in the marine diatom *Skeletonema costatum*, *Limnol Oceanogr*,  
591 1807-1817, 2000.
- 592 2. Bouchard, J. N., Roy, S., and Campbell, D. A.: UVB Effects on the Photosystem  
593 II - D1 Protein of Phytoplankton and Natural Phytoplankton Communities,  
594 *Photochem Photobiol*, 82, 936-951, 2006.
- 595 3. Breitbarth, E., Mills, M. M., Friedrichs, G., and LaRoche, J.: The Bunsen gas  
596 solubility coefficient of ethylene as a function of temperature and salinity and its  
597 importance for nitrogen fixation assays, *Limnol. Oceanogr. Methods*, 2, 282-288,  
598 2004.
- 599 4. Cai, X., Gao, K., Fu, F., Campbell, D., Beardall, J., and Hutchins, D.: Electron  
600 transport kinetics in the diazotrophic cyanobacterium *Trichodesmium* spp. grown  
601 across a range of light levels, *Photosyn. Res.*, 124, 45-56, 10.1007/s11120-015-  
602 0081-5, 2015.
- 603 5. Campbell, D., Eriksson, M. J., Oquist, G., Gustafsson, P., and Clarke, a. K.: The  
604 cyanobacterium *Synechococcus* resists UV-B by exchanging photosystem II  
605 reaction-center D1 proteins., *Proceedings of the National Academy of Sciences* 95,  
606 364-369, 1998.
- 607 6. Capone, D.: Determination of nitrogenase activity in aquatic samples using the  
608 acetylene reduction procedure, In P. F. Kemp, B. F. Sherr, E. B. Sherr, and J. J.  
609 Cole (ed.), *Handbook of methods in aquatic microbial ecology*. Lewis Publishers,  
610 Boca Raton, Fla, p. 621–631, 1993.
- 611 7. Capone, D., Zehr, J., Paerl, H., and Bergman, B.: *Trichodesmium*, a globally  
612 significant marine cyanobacterium, *Science*, 276, 1221-1227, 1997.
- 613 8. Capone, D. G., Subramaniaml, A., Joseph, P., Carpenters, E. J., Johansen, M., and

- 614 Ronald, L.: An extensive bloom of the N<sub>2</sub>-fixing cyanobacterium *Trichodesmium*  
615 *erythraeum* in the central Arabian Sea, *Mar. Ecol. Prog. Ser.*, 172, 281-292, 1998.
- 616 9. Carpenter, E. J., Subramaniam, A., and Capone, D. G.: Biomass and primary  
617 productivity of the cyanobacterium *Trichodesmium* spp. in the tropical N Atlantic  
618 ocean, *Deep Sea Research Part I: Oceanographic Research Papers*, 51, 173-203,  
619 10.1016/j.dsr.2003.10.006, 2004.
- 620 10. Chen, Y. B., Zehr, J. P., and Mellon, M.: Growth and nitrogen fixation of the  
621 diazotrophic filamentous nonheterocystous cyanobacterium *Trichodesmium* sp.  
622 IMS101 in defined media: evidence for a circadian rhythm, *J Phycol*, 32, 916-923,  
623 1996.
- 624 11. Cleveland, J. S., and Weidemann, A. D.: Quantifying Absorption by Aquatic  
625 Particles: A Multiple Scattering Correction for Glass-Fiber, *Limnol Oceanogr*, 38,  
626 1321-1327, 1993.
- 627 12. Cockell, C. S., and Rothschild, L. J.: The Effects of UV Radiation A and B on  
628 Diurnal Variation in Photosynthesis in Three Taxonomically and Ecologically  
629 Diverse Microbial Mats, *Photochem Photobiol*, 69, 203-210, 10.1111/j.1751-  
630 1097.1999.tb03274.x, 1999.
- 631 13. Cullen, J. J., and Neale, P. J.: Ultraviolet radiation, ozone depletion, and marine  
632 photosynthesis, *Photosyn. Res.*, 39, 303-320, 10.1007/bf00014589, 1994.
- 633 14. Dunlap, W., Rae, G., Helbling, E., Villafañe, V., and Holm-Hansen, O.: Ultraviolet-  
634 absorbing compounds in natural assemblages of Antarctic phytoplankton, *Antarct*  
635 *J U S*, 30, 323-326, 1995.
- 636 15. Fay, P.: Oxygen relations of nitrogen fixation in cyanobacteria, *Microbiol. Rev.*, 56,  
637 340-373, 1992.
- 638 16. Fu, F.-X., Yu, E., Garcia, N. S., Gale, J., Luo, Y., Webb, E. A., and Hutchins, D. A.:  
639 Differing responses of marine N<sub>2</sub> fixers to warming and consequences for future  
640 diazotroph community structure, *Aquat. Microb. Ecol.*, 72, 33-46, 2014.
- 641 17. Garcia-Pichel, F., and W.Castenholz, R.: Occurrence of UV-

- 642 absorbingmycosporine-like compounds among cyanobacterial isolates and  
643 estimationof their screening capacity, *Appl. Environ. Microbiol.*, 163-169, 1993.
- 644 18. Genty, B., Briantais, J.-M., and Baker, N. R.: The relationship between the quantum  
645 yield of photosynthetic electron transport and quenching of chlorophyll  
646 fluorescence, *Biochimica et Biophysica Acta (BBA) - General Subjects*, 990, 87-  
647 92, [http://dx.doi.org/10.1016/S0304-4165\(89\)80016-9](http://dx.doi.org/10.1016/S0304-4165(89)80016-9), 1989.
- 648 19. Häder, D.-P., and Gao, K.: Interactions of anthropogenic stress factors on marine  
649 phytoplankton, *Frontiers in Environmental Science*, 3, 1-14, 2015.
- 650 20. Häder, D. P., Williamson, C. E., Wangberg, S. A., Rautio, M., Rose, K. C., Gao, K.,  
651 Helbling, E. W., Sinha, R. P., and Worrest, R.: Effects of UV radiation on aquatic  
652 ecosystems and interactions with other environmental factors, *Photochem.*  
653 *Photobiol. Sci.*, 14, 108-126, [10.1039/c4pp90035a](https://doi.org/10.1039/c4pp90035a), 2015.
- 654 21. He, Y.-Y., Klisch, M., and Häder, D.-P.: Adaptation of cyanobacteria to UV-B stress  
655 correlated with oxidative stress and oxidative damage., *Photochem Photobiol*, 76,  
656 188-196, 2002.
- 657 22. Heraud, P., and Beardall, J.: Changes in chlorophyll fluorescence during exposure  
658 of *Dunaliella tertiolecta* to UV radiation indicate a dynamic interaction between  
659 damage and repair processes, *Photosyn. Res.*, 63, 123-134,  
660 [10.1023/a:1006319802047](https://doi.org/10.1023/a:1006319802047), 2000.
- 661 23. Hutchins, D. A., Walworth, N. G., Webb, E. A., Saito, M. A., Moran, D., McIlvin,  
662 M. R., Gale, J., and Fu, F.-X.: Irreversibly increased nitrogen fixation in  
663 *Trichodesmium* experimentally adapted to elevated carbon dioxide, *Nature*  
664 *Communication*, 6, 8155, [10.1038/ncomms9155](https://doi.org/10.1038/ncomms9155), 2015.
- 665 24. Karsten, U., Sawall, T., and Wiencke, C.: A survey of the distribution of UV-  
666 absorbing substances in tropical macroalgae, *Phycol. Res.*, 46, 271-279,  
667 [10.1046/j.1440-1835.1998.00144.x](https://doi.org/10.1046/j.1440-1835.1998.00144.x), 1998.
- 668 25. Kiefer, D. A., and SooHoo, J. B.: Spectral absorption by marine particles of coastal  
669 waters of Baja California, *Limnol Oceanogr*, 27, 492-499, 1982.

- 670 26. Kranz, S. A., Levitan, O., Richter, K. U., Prasil, O., Berman-Frank, I., and Rost, B.:  
671 Combined effects of CO<sub>2</sub> and light on the N<sub>2</sub>-fixing cyanobacterium  
672 *Trichodesmium* IMS101: physiological responses, *Plant Physiol.*, 154, 334-345,  
673 10.1104/pp.110.159145, 2010.
- 674 27. Kumar, A., Tyagi, M. B., Jha, P. N., Srinivas, G., and Singh, A.: Inactivation of  
675 cyanobacterial nitrogenase after exposure to Ultraviolet-B radiation, *Curr.*  
676 *Microbiol.*, 46, 380-384, 10.1007/s00284-001-3894-8, 2003.
- 677 28. Litchman, Elena, Patrick J. Neale, and Anastazia T. Banaszak.: Increased  
678 sensitivity to ultraviolet radiation in nitrogen-limited dinoflagellates:  
679 Photoprotection and repair, *Limnol Oceanogr*, 47, 86-94, 2002.
- 680 29. Lesser, M. P.: Effects of ultraviolet radiation on productivity and nitrogen fixation  
681 in the Cyanobacterium, *Anabaena* sp. (Newton's strain), *Hydrobiologia*, 598, 1-9,  
682 10.1007/s10750-007-9126-x, 2007.
- 683 30. Luo, Y.-W., Lima, I. D., Karl, D. M., and Doney, S. C.: Data-based assessment of  
684 environmental controls on global marine nitrogen fixation, *BGeo*, 11, 619-708,  
685 2014.
- 686 31. Mitchell, B. G.: Algorithms for determining the absorption coefficient for aquatic  
687 particulates using the quantitative filter technique, Orlando'90, 16-20 April, 1990,  
688 137-148,
- 689 32. Neale, Patrick J., Anastazia T. Banaszak, and Catherine R. Jarriel.: Ultraviolet  
690 sunscreens in *Gymnodinium sanguineum* (Dinophyceae): mycosporine-like amino  
691 acids protect against inhibition of photosynthesis. *J Phycol*, 34, 928-938, 1998.
- 692 33. Neale, P. J., and Thomas, B. C.: Inhibition by ultraviolet and photosynthetically  
693 available radiation lowers model estimates of depth-integrated picophytoplankton  
694 photosynthesis: global predictions for *Prochlorococcus* and *Synechococcus*, *Glob*  
695 *Change Biol*, 13356, 10.1111/gcb.13356, 2016.
- 696 34. Olson, E. M., McGillicuddy, D. J., Dyrman, S. T., Waterbury, J. B., Davis, C. S.,  
697 and Solow, A. R.: The depth-distribution of nitrogen fixation by *Trichodesmium*

- 698 spp. colonies in the tropical–subtropical North Atlantic, Deep Sea Research Part I:  
699 Oceanographic Research Papers, 104, 72-91, 10.1016/j.dsr.2015.06.012, 2015.
- 700 35. Prufert-Bebout, L., Paerl, H. W., and Lassen, C.: Growth, nitrogen fixation, and  
701 spectral attenuation in cultivated *Trichodesmium* species, Appl Environ Microb, 59,  
702 1367-1375, 1993.
- 703 36. Quesada, A., Vincent, W. F., and Lean, D. R. S.: Community and pigment structure  
704 of Arctic cyanobacterial assemblages: the occurrence and distribution of UV-  
705 absorbing compounds, FEMS Microbiol. Ecol., 28, 315-323, 10.1111/j.1574-  
706 6941.1999.tb00586.x, 1999.
- 707 37. Rastogi, R. P., Sinha, R. P., Moh, S. H., Lee, T. K., Kottuparambil, S., Kim, Y. J.,  
708 Rhee, J. S., Choi, E. M., Brown, M. T., Hader, D. P., and Han, T.: Ultraviolet  
709 radiation and cyanobacteria, J. Photochem. Photobiol. B: Biol., 141, 154-169,  
710 10.1016/j.jphotobiol.2014.09.020, 2014.
- 711 38. Rath, J., and Adhikary, S. P.: Response of the estuarine cyanobacterium *Lyngbya*  
712 *aestuarii* to UV-B radiation, J Appl Phycol, 19, 529-536, 2007.
- 713 39. Ritchie, R. J.: Consistent sets of spectrophotometric chlorophyll equations for  
714 acetone, methanol and ethanol solvents, Photosyn. Res., 89, 27-41,  
715 10.1007/s11120-006-9065-9, 2006.
- 716 40. Shi, D., Kranz, S. A., Kim, J. M., and Morel, F. M. M.: Ocean acidification slows  
717 nitrogen fixation and growth in the dominant diazotroph *Trichodesmium* under  
718 low-iron conditions, Proceedings of the National Academy of Sciences, 109,  
719 E3094-E3100, 2012.
- 720 41. Shick, J. M., and Dunlap, W. C.: Mycosporine-like amino acids and related  
721 Gadusols: biosynthesis, accumulation, and UV-protective functions in aquatic  
722 organisms, Annu Rev Physiol, 64, 223-262,  
723 10.1146/annurev.physiol.64.081501.155802, 2002.
- 724 42. Singh, Shailendra P., Sunita Kumari, Rajesh P. Rastogi, Kanchan L. Singh, and  
725 Rajeshwar P. Sinha.: Mycosporine-like amino acids (MAAs): chemical structure,

- 726 biosynthesis and significance as UV-absorbing/screening compounds, *Indian J*  
727 *Exp Biol*, 46, 7-17, 2008.
- 728 43. Singh, S. P., Rastogi, R. P., Hader, D. P., and Sinha, R. P.: Temporal dynamics of  
729 ROS biogenesis under simulated solar radiation in the cyanobacterium *Anabaena*  
730 *variabilis* PCC 7937, *Protoplasma*, 251, 1223-1230, 10.1007/s00709-014-0630-3,  
731 2014.
- 732 44. Sinha, R. P., Singh, N., Kumar, A., Kumar, H. D., Häder, M., and Häder, D. P.:  
733 Effects of UV irradiation on certain physiological and biochemical processes in  
734 cyanobacteria, *J. Photochem. Photobiol. B: Biol.*, 32, 107-113,  
735 [http://dx.doi.org/10.1016/1011-1344\(95\)07205-5](http://dx.doi.org/10.1016/1011-1344(95)07205-5), 1996.
- 736 45. Sinha, R. P., Singh, N., Kumar, A., Kumar, H. D., and Häder, D.-P.: Impacts of  
737 ultraviolet-B irradiation on nitrogen-fixing cyanobacteria of rice paddy fields, *J*  
738 *Plant Physiol*, 150, 188-193, [http://dx.doi.org/10.1016/S0176-1617\(97\)80201-5](http://dx.doi.org/10.1016/S0176-1617(97)80201-5),  
739 1997.
- 740 46. Sinha, R. P., Klisch, M., Walter Helbling, E., and Häder, D.-P.: Induction of  
741 mycosporine-like amino acids (MAAs) in cyanobacteria by solar ultraviolet-B  
742 radiation, *J. Photochem. Photobiol. B: Biol.*, 60, 129-135,  
743 [http://dx.doi.org/10.1016/S1011-1344\(01\)00137-3](http://dx.doi.org/10.1016/S1011-1344(01)00137-3), 2001.
- 744 47. Sinha, R. P., Ambasht, N. K., Sinha, J. P., Klisch, M., and Häder, D.-P.: UV-B-  
745 induced synthesis of mycosporine-like amino acids in three strains of *Nodularia*  
746 (cyanobacteria), *J. Photochem. Photobiol. B: Biol.*, 71, 51-58,  
747 <http://dx.doi.org/10.1016/j.jphotobiol.2003.07.003>, 2003.
- 748 48. Sinha, R. P., and Häder, D.-P.: UV-protectants in cyanobacteria, *Plant Sci.*, 174,  
749 278-289, 10.1016/j.plantsci.2007.12.004, 2008.
- 750 49. Sobrino, C., and Neale, P. J.: Short-term and long-term effects of temperature on  
751 photosynthesis in the diatom *Thalassiosira Pseudonana* under UVR exposures, *J*  
752 *Phycol*, 43, 426-436, 10.1111/j.1529-8817.2007.00344.x, 2007.
- 753 50. Sohm, J. A., Webb, E. A., and Capone, D. G.: Emerging patterns of marine nitrogen

- 754 fixation, *Nat Rev Microbiol*, 9, 499-508, 10.1038/nrmicro2594, 2011.
- 755 51. Spungin, D., Berman-Frank, I., and Levitan, O.: *Trichodesmium's* strategies to  
756 alleviate P-limitation in the future acidified oceans, *Environ. Microbiol.*, 16,  
757 1935-1947, 10.1111/1462-2920.12424, 2014.
- 758 52. Subramaniam, A., Carpenter, E. J., Karentz, D., and Falkowski, P. G.: Bio-optical  
759 properties of the marine diazotrophic cyanobacteria *Trichodesmium* spp. I.  
760 Absorption and photosynthetic action spectra, *Limnol Oceanogr*, 44, 608-617,  
761 1999.
- 762 53. Vernet, M., and Whitehead, K.: Release of ultraviolet-absorbing compounds by the  
763 red-tide dinoflagellate *Lingulodinium polyedra*, *Mar. Biol.*, 127, 35-44,  
764 10.1007/bf00993641, 1996.
- 765 54. Villafañe, V. E., Barbieri, E. S., and Helbling, E. W.: Annual patterns of ultraviolet  
766 radiation effects on temperate marine phytoplankton off Patagonia, Argentina, *J*  
767 *Plankton Res*, 26, 167-174, 10.1093/plankt/fbh011, 2004.
- 768 55. Westberry, T. K., and Siegel, D. A.: Spatial and temporal distribution of  
769 *Trichodesmium* blooms in the world's oceans, *GBioC*, 20, GB4016,  
770 10.1029/2005gb002673, 2006.
- 771 56. Wu, H., Gao, K., Villafane, V. E., Watanabe, T., and Helbling, E. W.: Effects of  
772 solar UV radiation on morphology and photosynthesis of filamentous  
773 cyanobacterium *Arthrospira platensis*, *Appl Environ Microb*, 71, 5004-5013,  
774 10.1128/AEM.71.9.5004-5013.2005, 2005.
- 775 57. Wu, H., Abasova, L., Cheregi, O., Deák, Z., Gao, K., and Vass, I.: D1 protein  
776 turnover is involved in protection of Photosystem II against UV-B induced damage  
777 in the cyanobacterium *Arthrospira (Spirulina) platensis*, *J. Photochem. Photobiol.*  
778 *B: Biol.*, 104, 320-325, <http://dx.doi.org/10.1016/j.jphotobiol.2011.01.004>, 2011.
- 779 58. Wu, Y., Li, Z., Du, W., and Gao, K.: Physiological response of marine centric  
780 diatoms to ultraviolet radiation, with special reference to cell size, *J. Photochem.*  
781 *Photobiol. B: Biol.*, 153, 1-6, <http://dx.doi.org/10.1016/j.jphotobiol.2015.08.035>,



782 2015.

783
